# Supplementary material for: Rare Titin (TTN) Variants in Diseases Associated with Sudden Cardiac Death
Source: MDPI journal article supplement (doi:10.3390/ijms161025773), 2015-10-27
Supplement: s1 [file s1]

## Supplementary Information

**Table S2.** Titin Variants included in our cohort of study showing 4 or more repeats. Data reported and *in silico* prediction do not allowed a conclusive role.

| Protein Change | Disease                                     | Repeats | Different Disease | dbSNP/ClinVar                         | HGMD                           | MAF (%) (EA/AA/All)  | Polyphen-2        | Mutation Taster | Provean     |
|----------------|---------------------------------------------|---------|-------------------|---------------------------------------|--------------------------------|----------------------|-------------------|-----------------|-------------|
| p.1345G>D      | ARVC, DCM, SUD (2), HCM                     | 5       | yes               | rs36021856/Likely benign              | NA                             | 0.7326/0.0681/0.5075 | Probably Damaging | Disease Causing | Deleterious |
| p.1441R>P      | LQT, SUD (4), DCM                           | 6       | yes               | rs72647876/Benign                     | NA                             | 0.7558/0.227/0.5767  | Probably Damaging | Disease Causing | Deleterious |
| p.2917T>P      | HCM (6)                                     | 6       | no                | Novel                                 | NA                             | NA                   | Probably Damaging | Polymorphism    | Deleterious |
| p.3405A>T      | ARVC, HCM (7)                               | 8       | yes               | rs6433728                             | NA                             | 0.0/0.2634/0.0831    | Benign            | Disease Causing | Neutral     |
| p.3713T>S      | ARVC (2), HCM, SQT, DCM, SUD (7)            | 12      | yes               | rs72648925/Likely benign              | NA                             | 0.3536/0.0541/0.2605 | Benign            | Polymorphism    | Neutral     |
| p.3751P>R      | SUD (2), SUD/SIDS, ARVC, HCM (2)            | 6       | yes               | rs72648927/Likely benign              | CM1310239 /Cardiac dysrhythmia | 0.9016/0.1613/0.6707 | Probably Damaging | Polymorphism    | Deleterious |
| p.4191V>M      | SUD (2), SUD/SIDS, ARVC, HCM (2)            | 6       | yes               | rs72648937/Likely benign              | NA                             | 0.9062/0.6368/0.8195 | Benign            | Polymorphism    | Neutral     |
| p.5771A>V      | ARVC, DCM, SUD (3), HCM                     | 6       | yes               | rs72648960/Benign                     | NA                             | 0.3149/0.1567/0.2648 | Benign            | Polymorphism    | Neutral     |
| p.6301R>Q      | HCM (2), SUD (2)                            | 4       | yes               | rs72648969/Likely benign              | NA                             | 0.4/0.07/0.2         | Probably Damaging | Polymorphism    | Neutral     |
| p.6500N>K      | ARVC (2), DCM, SUD (2)                      | 5       | yes               | rs72648972/Likely benign              | NA                             | 0.2089/0.0274/0.1527 | Benign            | Polymorphism    | Neutral     |
| p.7599T>M      | ARVC, SUD (3), HCM                          | 5       | yes               | rs72648990/<br>Uncertain significance | NA                             | 0.0856/0.0/0.0591    | Benign            | Polymorphism    | Deleterious |
| p.9631P>L      | ARVC, SUD (8), SUD/SIDS, CPVT, DCM, HCM (2) | 14      | yes               | rs72650031/<br>Uncertain significance | NA                             | 0.5875/0.0818/0.4308 | Benign            | Disease Causing | Deleterious |
| p.9895R>T      | SUD (4), HCM (4)                            | 8       | yes               | rs72650040/Likely benign              | NA                             | 0.3282/0.0267/0.234  | Benign            | Polymorphism    | Neutral     |
| p.10161V>L     | DCM, HCM (2), LQT (3), SUD (4)              | 10      | yes               | Novel                                 | NA                             | NA                   | Benign            | Polymorphism    | Neutral     |

Table S2. *Cont.*

| Protein Change | Disease                              | Repeats | Different Disease | dbSNP/ClinVar                          | HGMD | MAF (%) (EA/AA/All)  | Polyphen-2        | Mutation Taster | Provean     |
|----------------|--------------------------------------|---------|-------------------|----------------------------------------|------|----------------------|-------------------|-----------------|-------------|
| p.10801P>R     | ARVC, DCM, SUD (3), HCM              | 6       | yes               | rs72650066/Benign                      | NA   | 0.3414/0.1058/0.267  | Benign            | Polymorphism    | Neutral     |
| p.11967R>C     | SUD (3), HCM, LQT                    | 5       | yes               | rs12471771/Benign                      | NA   | 0.0722/0.2063/0.1149 | Probably Damaging | Disease Causing | Deleterious |
| p.11996S>T     | SUD, ARVC, HCM, SUD/SIDS             | 4       | yes               | rs181189778/<br>Uncertain significance | NA   | 0.0/0.0805/0.0251    | Probably Damaging | Disease Causing | Neutral     |
| p.13163R>C     | ARVC, SUD (2), HCM                   | 4       | yes               | rs72677231/<br>Uncertain significance  | NA   | 0.2889/0.0517/0.2136 | Probably Damaging | Disease Causing | Deleterious |
| p.13340R>H     | HCM (6), DCM, SUD (4), SUD/SIDS      | 12      | yes               | rs72677237                             | NA   | 0.8798/0.1616/0.6556 | Probably Damaging | Disease Causing | Deleterious |
| p.20476P>S     | ARVC (2), DCM, LQT (2), SUD, HCM (4) | 10      | yes               | rs55980498/Likely benign               | NA   | 0.1/0.5/0.4          | Probably Damaging | Disease Causing | Deleterious |
| p.20658S>G     | HCM (6), DCM, SUD (4), SUD/SIDS      | 12      | yes               | rs72646885                             | NA   | 0.9183/0.1033/0.6585 | Probably Damaging | Disease Causing | Deleterious |
| p.21743T>A     | SUD, HCM, SUD/SIDS (2)               | 4       | yes               | rs56201325/<br>Uncertain significance  | NA   | 0.5194/0.0523/0.3718 | Benign            | Polymorphism    | Deleterious |
| p.22041E>Q     | CPVT, HCM (3), SUD (2)               | 6       | yes               | rs55762754/<br>Uncertain significance  | NA   | 0.2413/0.0259/0.173  | Probably Damaging | Disease Causing | Neutral     |
| p.25204N>I     | LQT, LVNC, SUD, HCM (5)              | 8       | yes               | Novel                                  | NA   | NA                   | Probably Damaging | Disease Causing | Deleterious |
| p.26315E>K     | SUD (8)                              | 8       | no                | Novel                                  | NA   | NA                   | Probably Damaging | Disease Causing | Deleterious |
| p.26994G>D     | ARVC, SUD (3), HCM                   | 5       | yes               | rs72648235                             | NA   | 0.0239/0.0/0.0162    | Probably Damaging | Disease Causing | Deleterious |
| p.27228V>M     | HCM (4)                              | 4       | no                | rs72648237/<br>Uncertain significance  | NA   | 0.0362/0.0/0.0247    | Probably Damaging | Disease Causing | Neutral     |

Table S2. *Cont.*

| Protein Change | Disease                                        | Repeats | Different Disease | dbSNP/ClinVar                         | HGMD | MAF (%) (EA/AA/All)  | Polyphen-2        | Mutation Taster | Provean     |
|----------------|------------------------------------------------|---------|-------------------|---------------------------------------|------|----------------------|-------------------|-----------------|-------------|
| p.27957I>V     | DCM, SUD (2), ARVC, BrS, HCM (2), SUD/SIDS (2) | 9       | yes               | rs72648244                            | NA   | 0.9688/0.2765/0.7562 | Benign            | Polymorphism    | Neutral     |
| p.28163I>V     | SUD (4), SUD/SIDS (2), HCM (2), LQT, SUD       | 10      | yes               | rs16866391/Benign                     | NA   | 0.1572/0.285/0.1978  | Benign            | Polymorphism    | Neutral     |
| p.28999D>E     | SUD, ARVC (2), HCM, SQT, SUD (5), DCM          | 11      | yes               | rs72648253                            | NA   | 0.3499/0.0773/0.263  | Benign            | Disease Causing | Neutral     |
| p.30019R>H     | ARVC (2), LQT, SUD (2), DCM, HCM               | 7       | yes               | rs55704830/<br>Uncertain significance | NA   | 0.3758/0.3621/0.3714 | Probably Damaging | Disease Causing | Deleterious |
| p.30229N>S     | SUD (8), SUD/SIDS (3), ARVC, BrS, HCM (3)      | 16      | yes               | rs149001703                           | NA   | 0.8111/0.097/0.5757  | Benign            | Disease Causing | Neutral     |
| p.31170R>C     | LQT (2), SUD (3), CPVT, DCM (2)                | 8       | yes               | rs56273463                            | NA   | 0.9761/0.2302/0.7372 | Probably Damaging | Disease Causing | Deleterious |
| p.31321V>I     | LQT, SUD (2), HCM                              | 4       | yes               | rs34924609                            | NA   | 0.6481/0.1623/0.4969 | Benign            | Disease Causing | Neutral     |
| p.33028T>I     | ARVC, DCM, SUD (2), HCM                        | 5       | yes               | rs55842557/Likely benign              | NA   | 0.6818/0.0793/0.4918 | Benign            | Polymorphism    | Deleterious |

BrS: Brugada Syndrome; LQT: Long QT Syndrome; SQT: Short QT Syndrome; CPVT: Catecholaminergic Polymorphic Ventricular Tachycardia; ARVC: Arrhythmogenic Right Ventricular Cardiomyopathy; HCM: Hypertrophic Cardiomyopathy; DCM: Dilated cardiomyopathy; LVNC: Left ventricular Non-Compaction; SUD: Sudden Unexplained Death; SIDS, Sudden Infant Death Syndrome; NA: Not Available. HGDM: Human Gene Mutation Database; MAF: Minor Allele Frequency; EA: European American; AA: African American; All: all populations. Numbers in the parentheses: Refer to number of variants repeated in the specific disease/syndrome.
